# Supplementary material
Source: MDPI journal article supplement (https://www.mdpi.com/2673-8392/4/1/16)
Supplement: s1 [file s1]

## **Supplementary A: Quality Appraisal – CASP Qualitative Checklist**

- *Section A: Are the results valid?*
  - Is there a clear statement of aims of research?
  - Are the qualitative methods appropriate?
  - Is the research design appropriate to address aims?
  - Is recruitment strategy appropriate for aims?
  - Has the data been collected appropriately?
  - Is the relationship between researcher and participant considered?
- *Section B: What are the results?*
  - Have ethical issues been considered?
  - Is there a clear statement of findings?
  - Was the data analysis rigorous?
- *Section C: Will the results help locally?*
  - How valuable is the research?
    - What contributions are made to existing knowledge?
    - Have new areas of research been identified?
    - Can findings be transferred to other populations?
    - Can the research be used in other ways?

## **Supplementary B: Data Extraction**

- Section A: Administrative Details
  - A1: Name of Reviewer
  - A2: Date of Review
  - A3: Document Details
    - A 3.1: Unique Identifier
    - A 3.2: Title of Paper
    - A 3.3: Authors of Paper
    - A 3.4: Year of publication
    - A 3.5: Journal name
    - A 3.6: Is the whole paper used for review?
- Section B: Study Background
  - B 1: What are the aims of the study and are they clearly reported?
  - B 2: What is the study's hypothesis and/or research questions?
  - B 3: In which country was the study carried out?
- Section C: Study Sample
  - C 1: Who are the study participants?
  - C 2: What is the total number of participants?
- Section D: Study Method
  - D 1: What qualitative method is used in the study?
  - D 2: How were participants recruited?
  - D 3: Was consent sought from participants?
- Section E: Data Collection
  - E 1: What method was used to collect data?
  - E 2: What tools/instruments were used to collect data?
  - E 3: Do authors discuss ways in which reliability and validity of data collection tools was addressed?
- Section F: Data analysis
  - F 1: What is the method of data analysis?
  - F 2: Do authors address reliability and validity of data analysis?
- Section G: Findings
  - G 1: What are the findings related to inclusive supervision?
  - G 2: Are findings generalisable to target populations?

### Supplementary C: Quality Appraisal Results

| Author and Year                   | Are the results valid? | What are the results? | Will the results help locally? | Quality ranking |
|-----------------------------------|------------------------|-----------------------|--------------------------------|-----------------|
| Alebaikan et al., 2020            | ✓✓✓✓✓×                 | ✓✓✓                   | ✓✓✓×                           | Moderate        |
| Elliot & Kobayashi, 2019          | ✓✓✓✓✓✓                 | ✓✓✓                   | ✓✓✓×                           | Moderate        |
| Kidman et al., 2017               | ✓✓✓✓✓×                 | ✓✓✓                   | ✓✓✓×                           | Moderate        |
| Acker and Haque, 2015             | ✓✓✓✓✓×                 | ✓✓✓                   | ✓✓✓✓                           | Moderate        |
| Walker, 2020 (book chapter)       | ✓✓✓✓✓✓                 | ✓✓✓                   | ✓✓✓✓                           | High            |
| Mattocks and Briscoe-Palmer, 2016 | ✓✓✓✓✓×                 | ✓✓✓                   | ✓✓✓×                           | Moderate        |
| Nomnian, 2017                     | ✓✓✓✓✓✓                 | ✓✓✓                   | ✓✓✓×                           | Moderate        |
| Pinto et al., 2020                | ✓✓✓✓✓×                 | ✓✓✓                   | ✓✓✓✓                           | Moderate        |
| Winchester-Seeto et al., 2014     | ✓✓✓✓✓✓                 | ✓✓✓                   | ✓✓✓×                           | Moderate        |
